# Supplementary material for: Fluorogenic affinity label for the facile, rapid imaging of proteins in live cells
Source: Royal Society of Chemistry journal article supplement (doi:10.1039/b907664f), 2009-01-01

## Fluorogenic affinity label for the facile, rapid imaging of proteins in live cells

Rex W. Watkins, Luke D. Lavis, Vanessa M. Kung, Georgyi V. Los and Ronald T. Raines\*

| Page | Contents                                                                        |
|------|---------------------------------------------------------------------------------|
| S1   | Table of Contents                                                               |
| S2   | 400 MHz $^1\text{H}$ NMR spectrum of compound <b>5</b> in DMSO- $d_6$ .         |
| S3   | 400 MHz $^{13}\text{C}$ NMR spectrum of compound <b>5</b> in DMSO- $d_6$ .      |
| S4   | 400 MHz $^1\text{H}$ NMR spectrum of compound <b>6</b> in $\text{CDCl}_3$ .     |
| S5   | 400 MHz $^{13}\text{C}$ NMR spectrum of compound <b>6</b> in $\text{CDCl}_3$ .  |
| S6   | 400 MHz $^1\text{H}$ NMR spectrum of compound <b>7</b> in acetone- $d_6$ .      |
| S7   | 400 MHz $^1\text{H}$ NMR spectrum of compound <b>9</b> in $\text{CDCl}_3$ .     |
| S8   | 400 MHz $^{13}\text{C}$ NMR spectrum of compound <b>9</b> in $\text{CDCl}_3$ .  |
| S9   | 400 MHz $^1\text{H}$ NMR spectrum of compound <b>10</b> in $\text{CDCl}_3$ .    |
| S10  | 400 MHz $^{13}\text{C}$ NMR spectrum of compound <b>10</b> in $\text{CDCl}_3$ . |
| S11  | 400 MHz $^1\text{H}$ NMR spectrum of compound <b>1</b> in $\text{CDCl}_3$ .     |

400 MHz  $^1\text{H}$  NMR spectrum of compound **5** in  $\text{DMSO-}d_6$ .

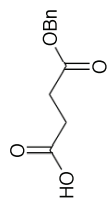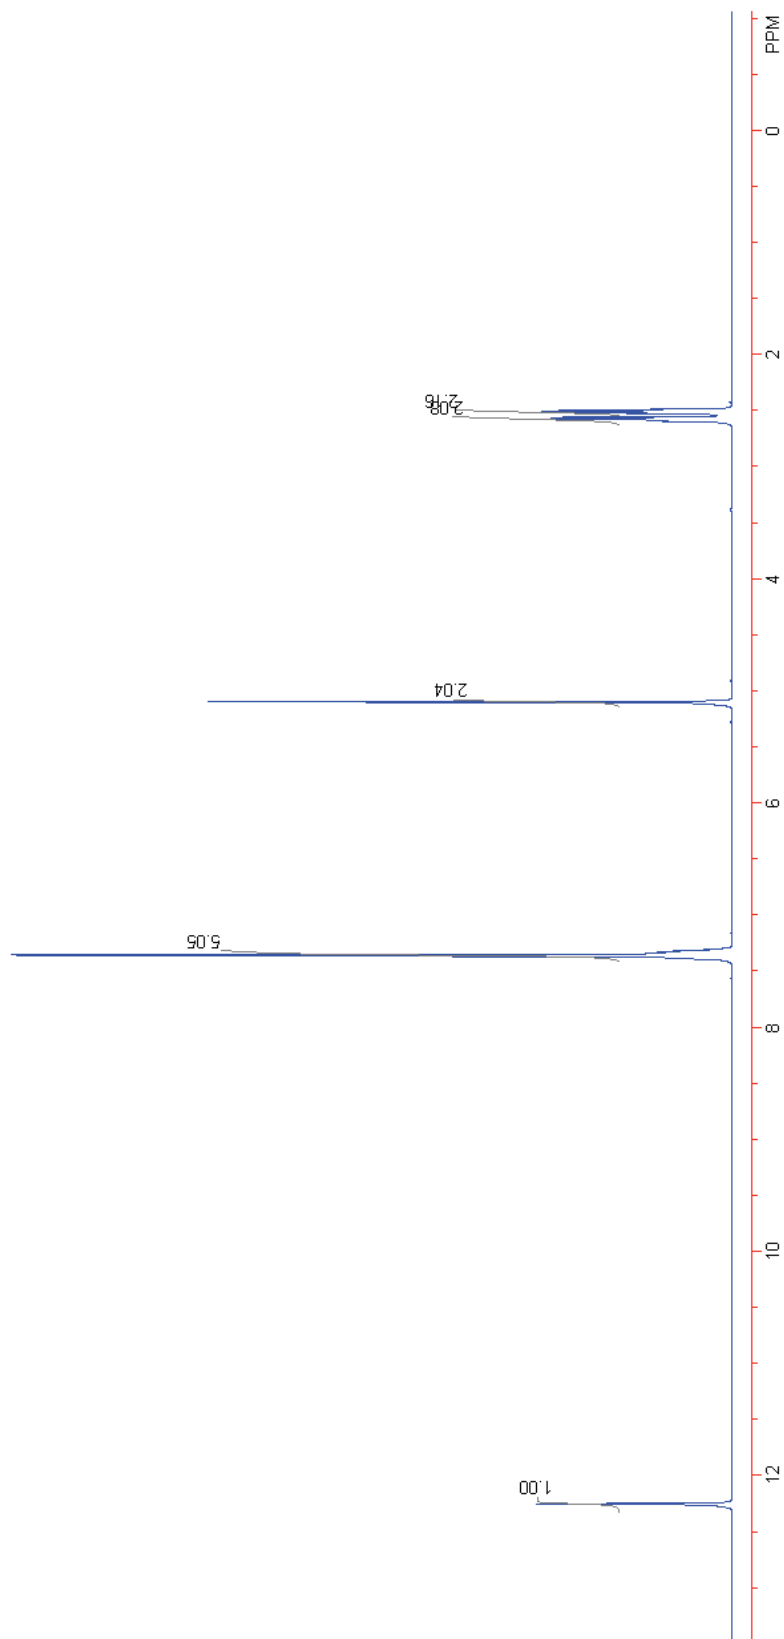

400 MHz  $^{13}\text{C}$  NMR spectrum of compound **5** in  $\text{DMSO-}d_6$ .

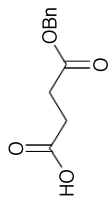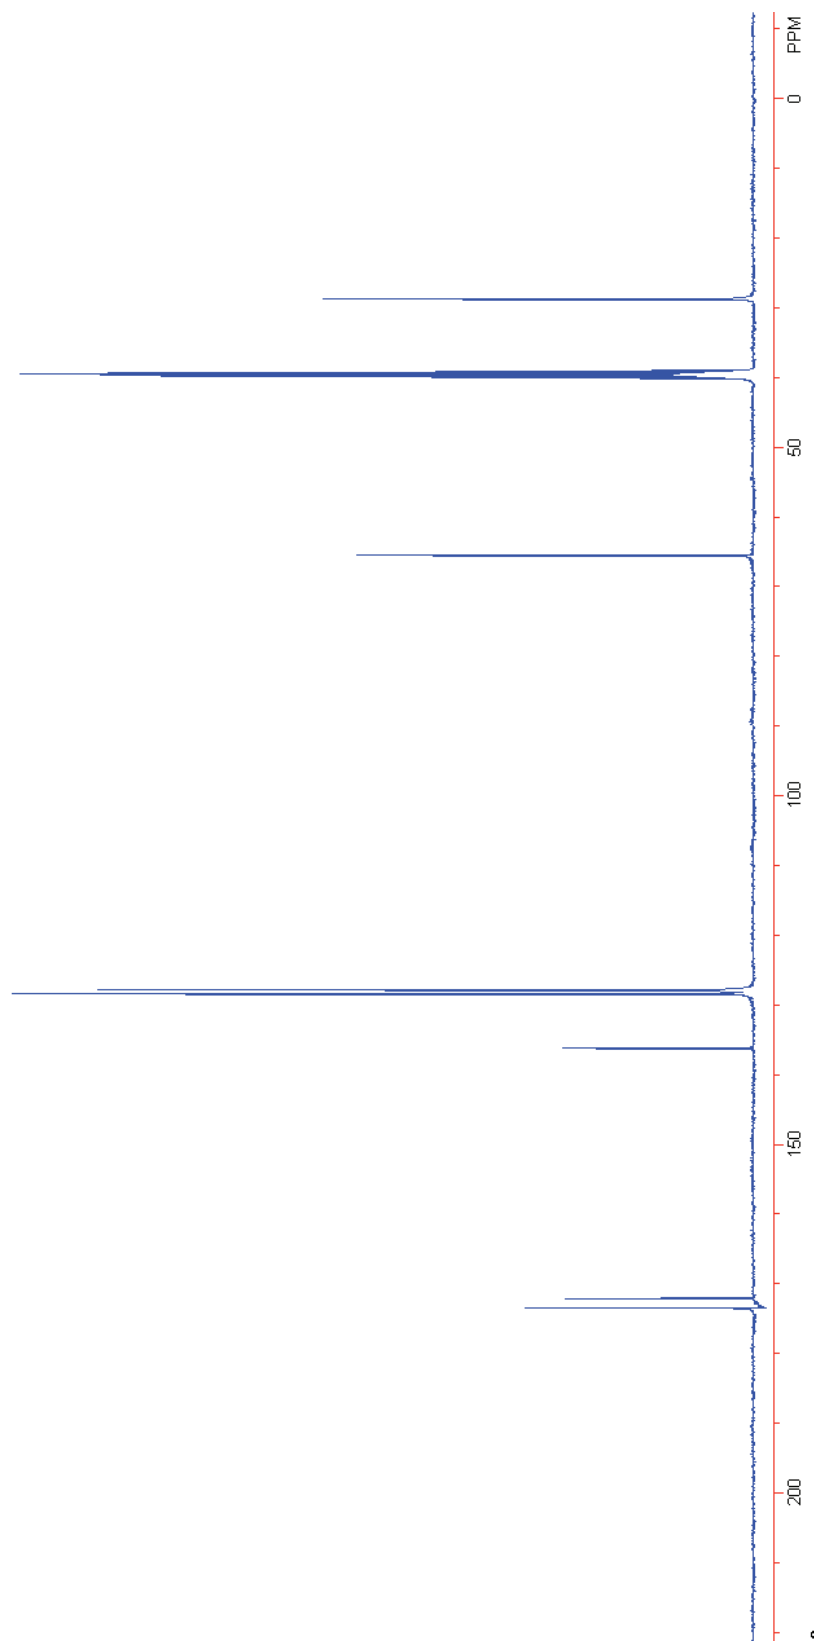

400 MHz  $^1\text{H}$  NMR spectrum of compound **6** in  $\text{CDCl}_3$ .

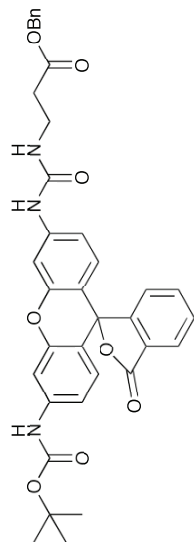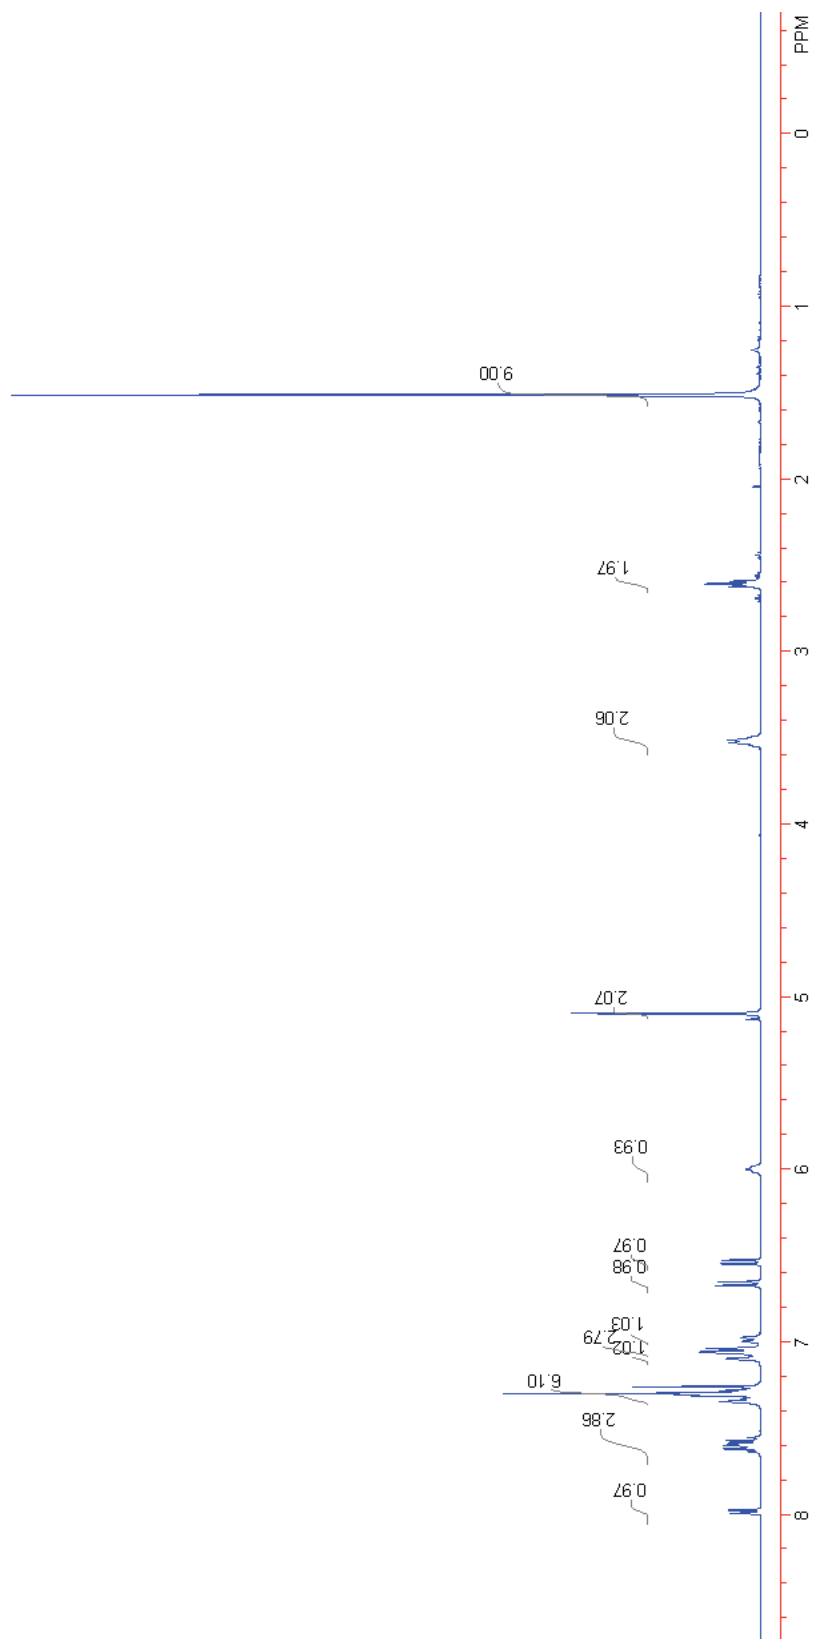

400 MHz  $^{13}\text{C}$  NMR spectrum of compound **6** in  $\text{CDCl}_3$ .

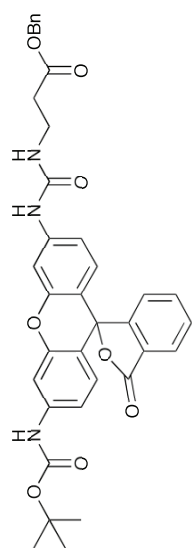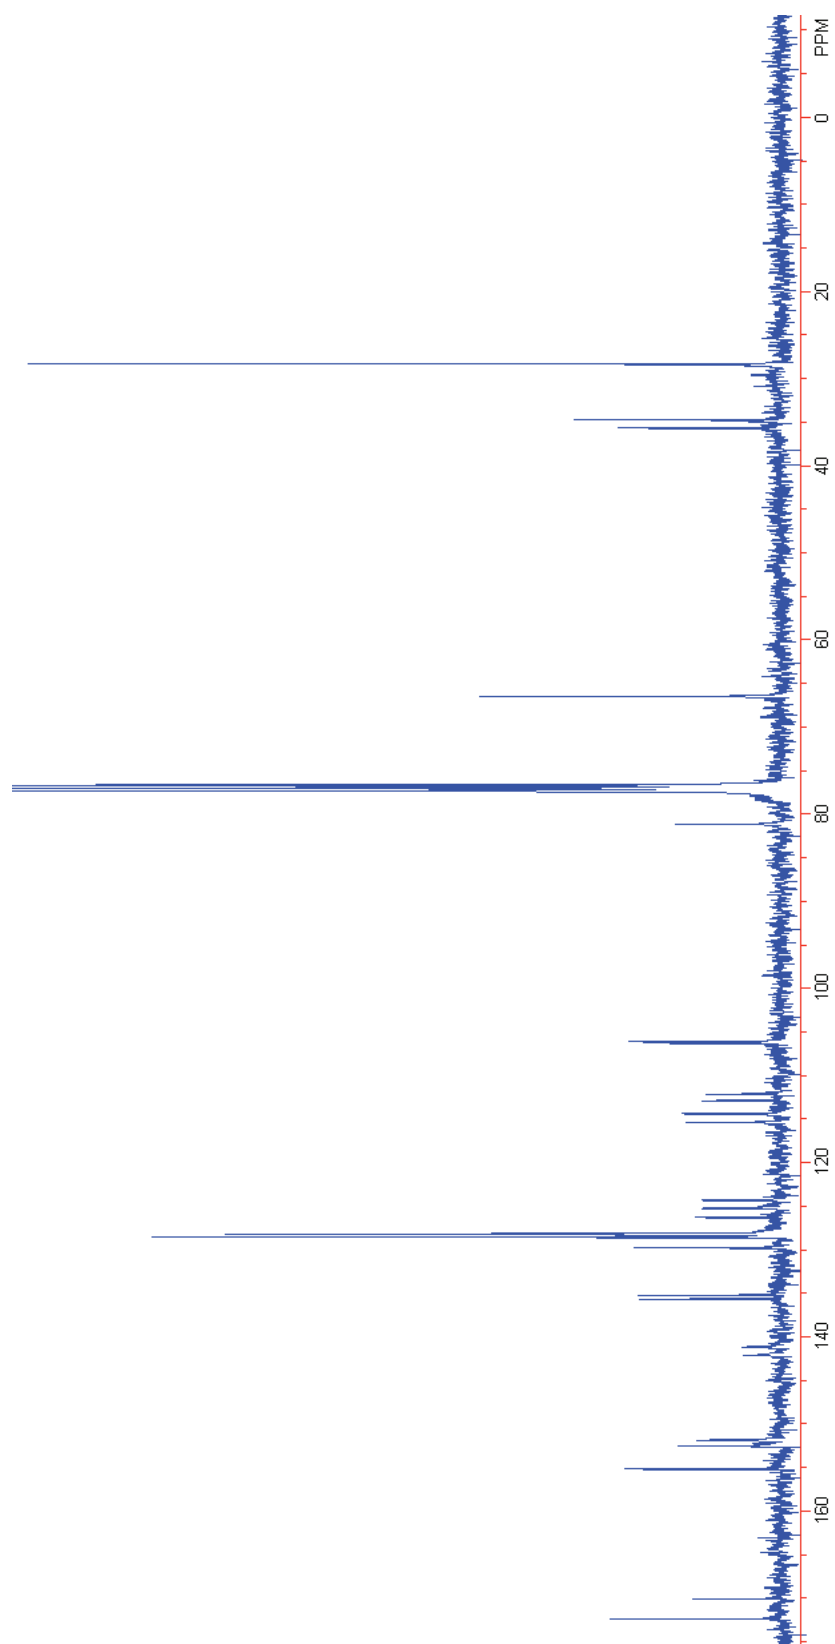

400 MHz  $^1\text{H}$  NMR spectrum of compound **7** in acetone- $d_6$ .

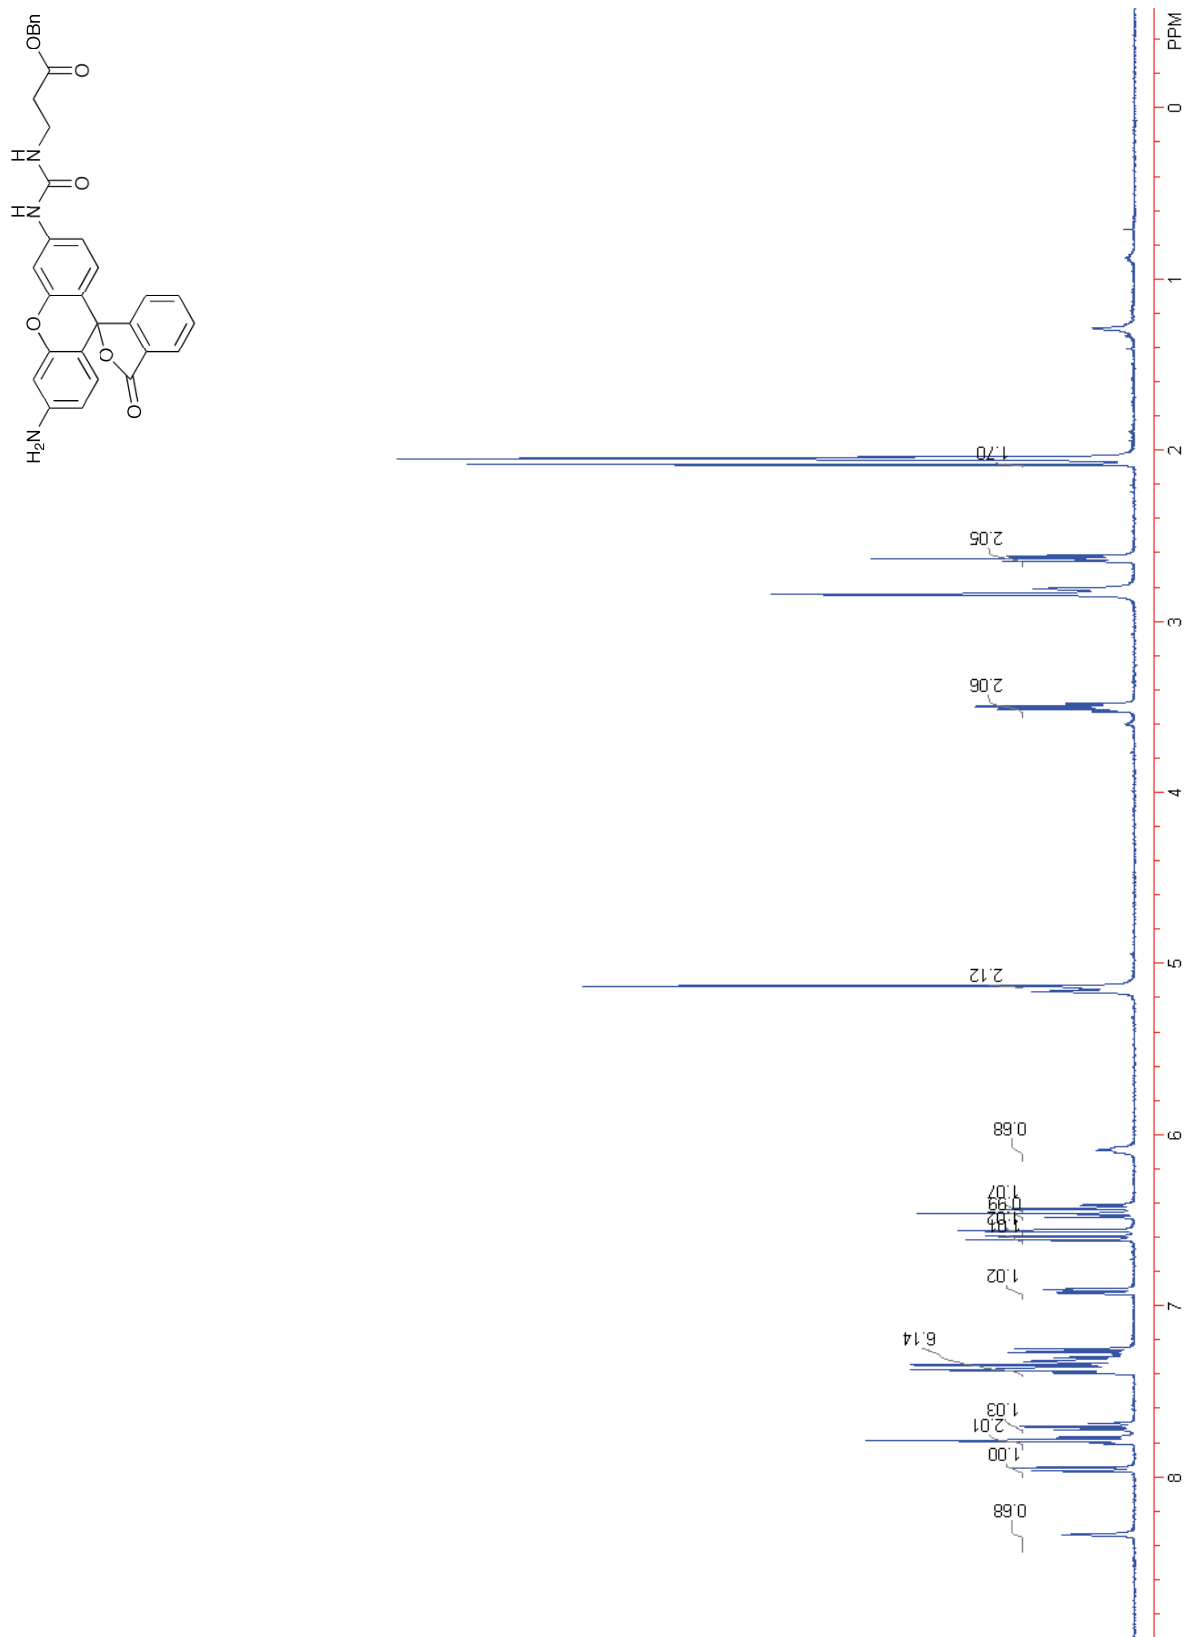

400 MHz  $^1\text{H}$  NMR spectrum of compound **9** in  $\text{CDCl}_3$ .

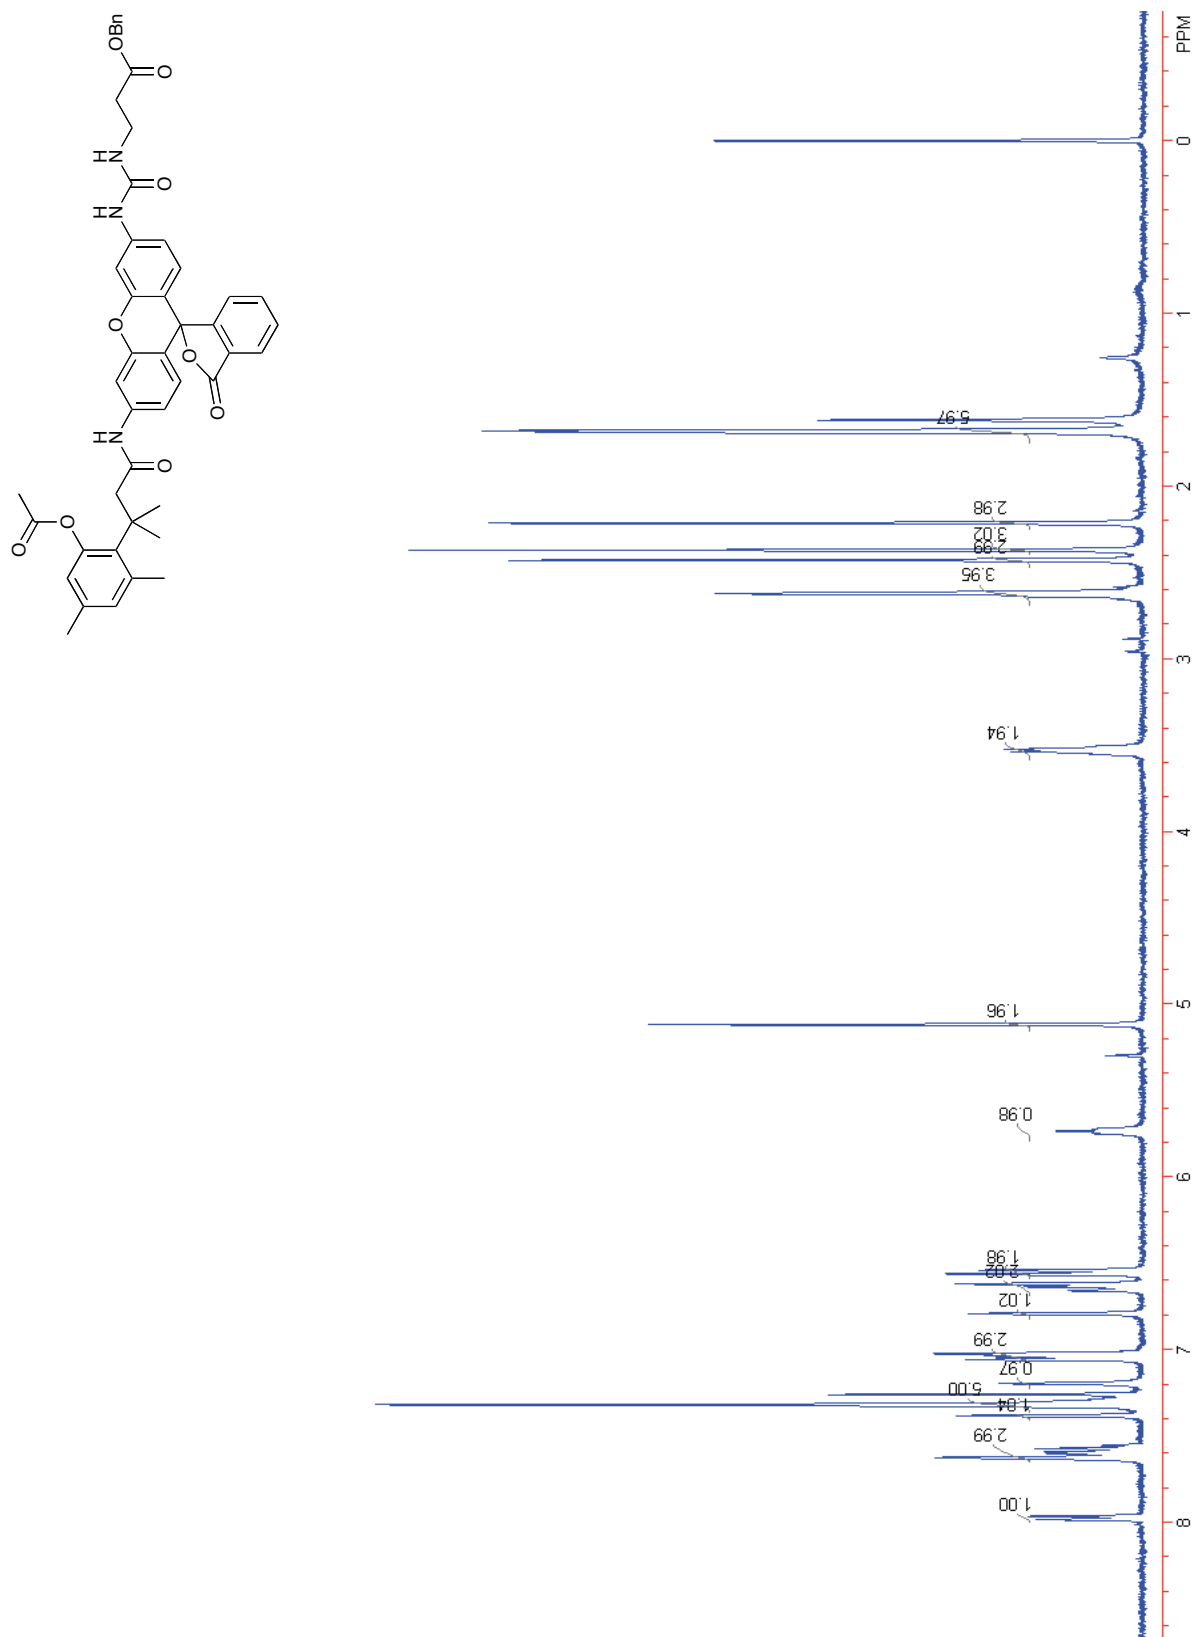

400 MHz  $^{13}\text{C}$  NMR spectrum of compound **9** in  $\text{CDCl}_3$ .

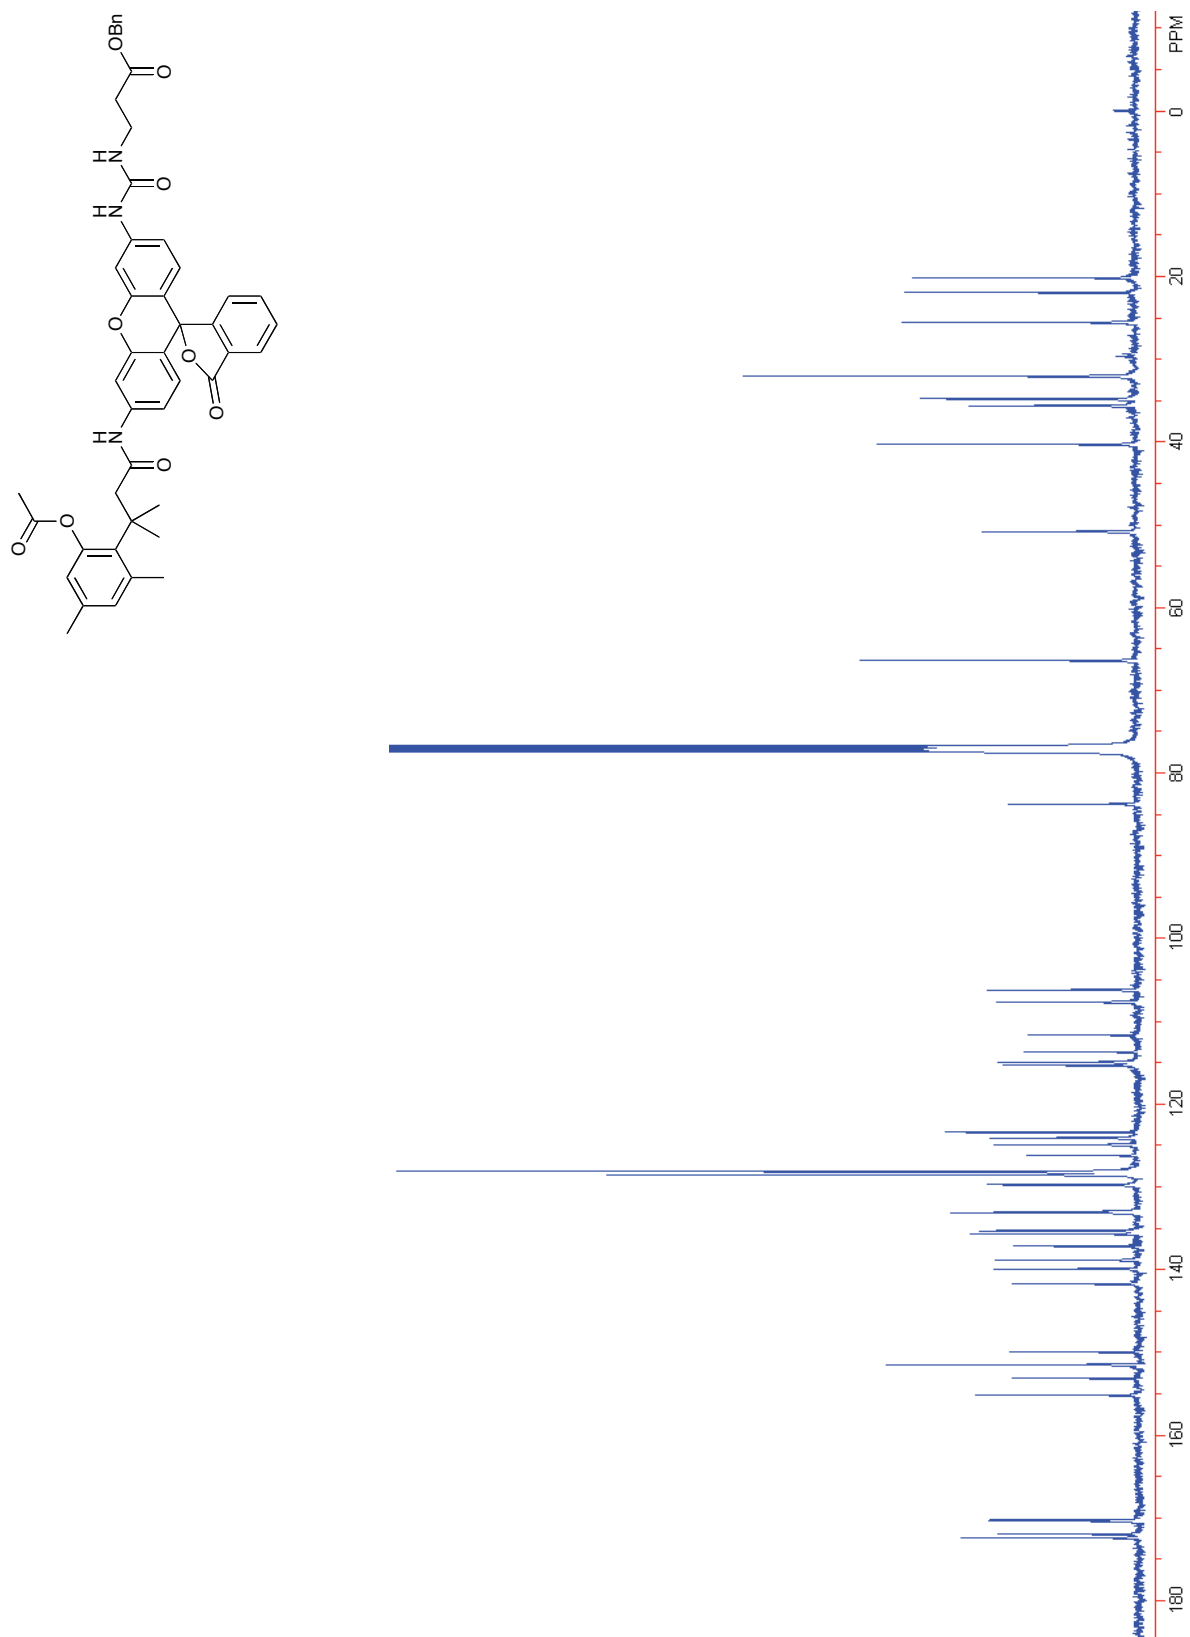



400 MHz  $^1\text{H}$  NMR spectrum of compound **10** in  $\text{CDCl}_3$ .

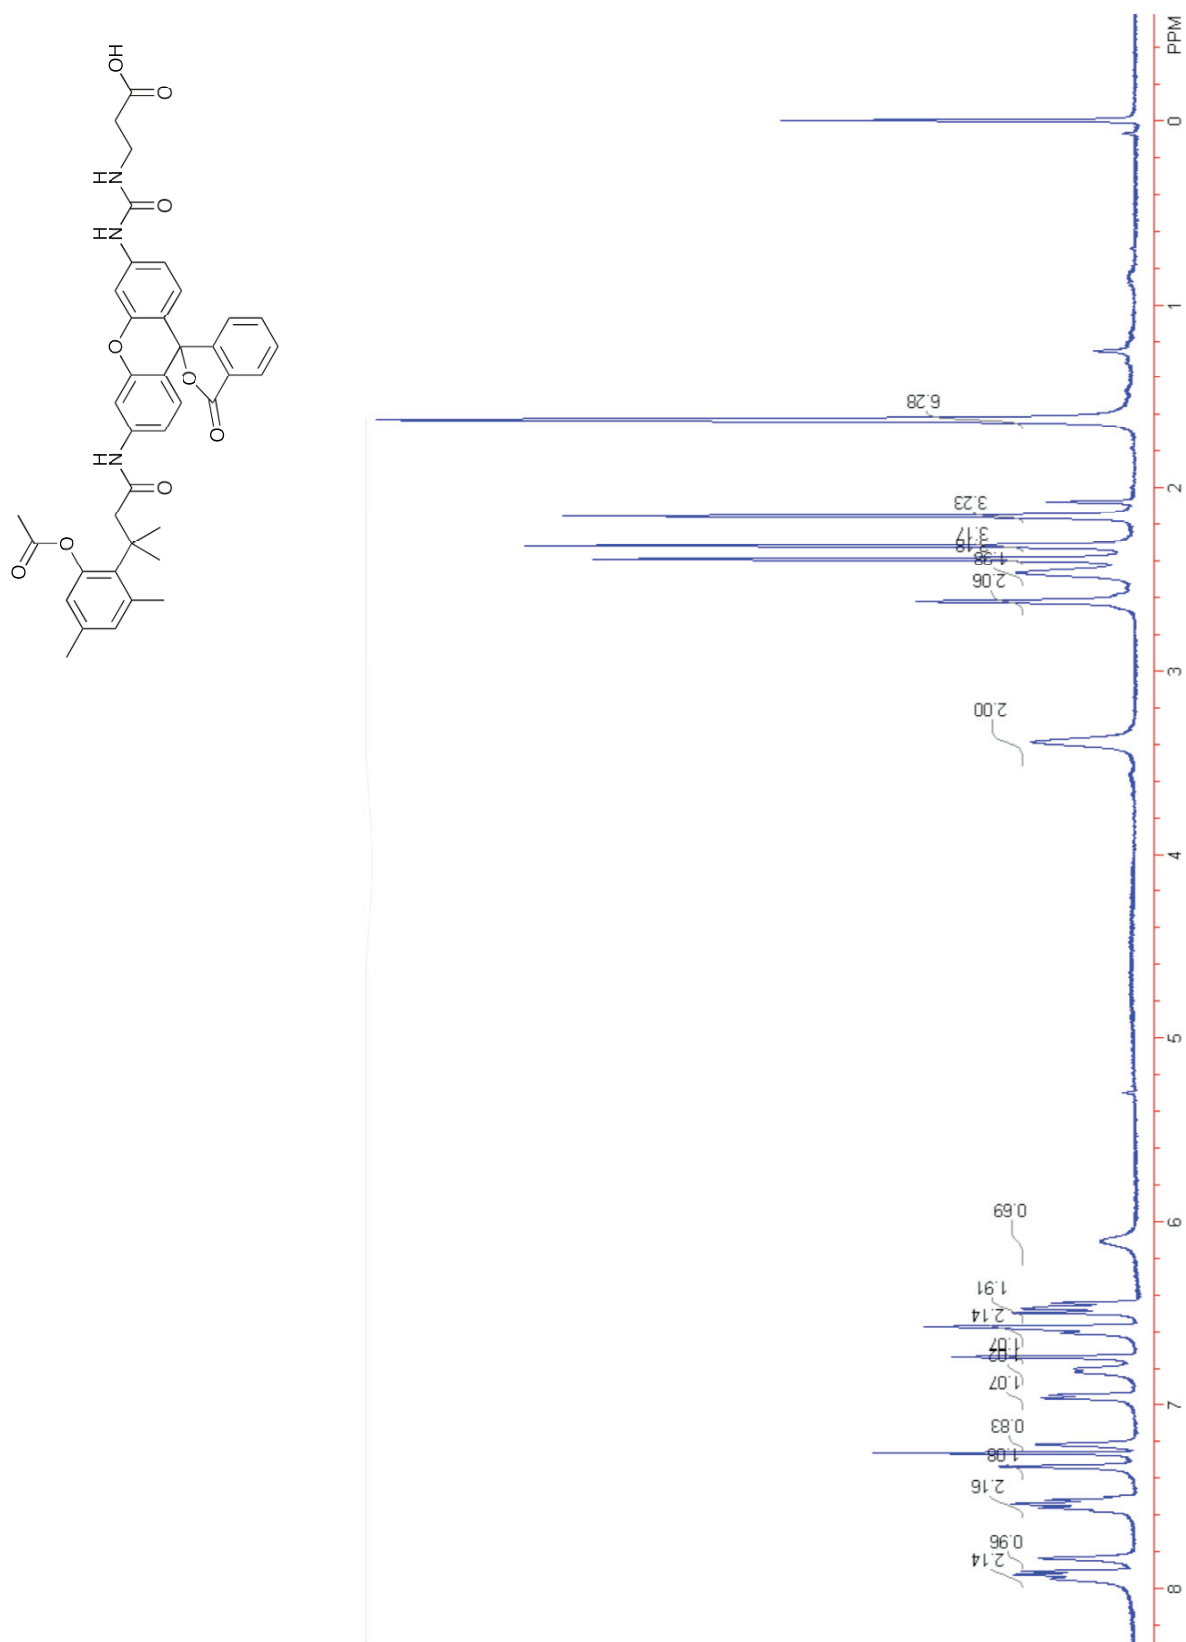

400 MHz  $^{13}\text{C}$  NMR spectrum of compound **10** in  $\text{CDCl}_3$ .

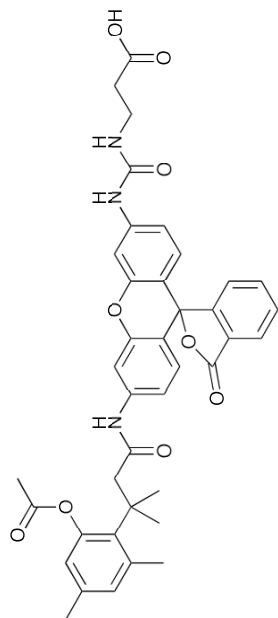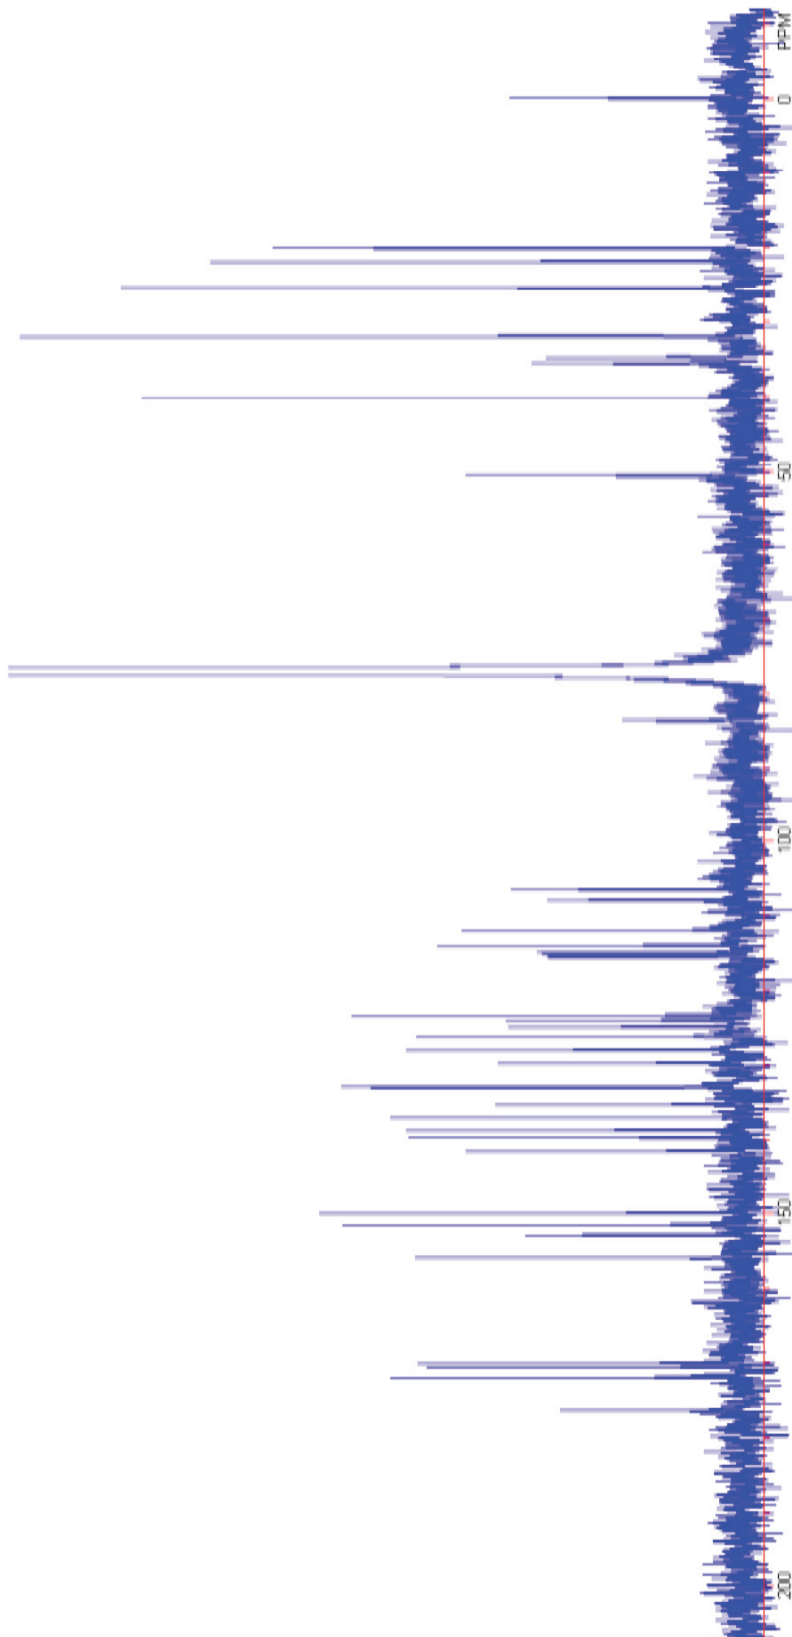

400 MHz  $^1\text{H}$  NMR spectrum of compound **1** in  $\text{CDCl}_3$ .

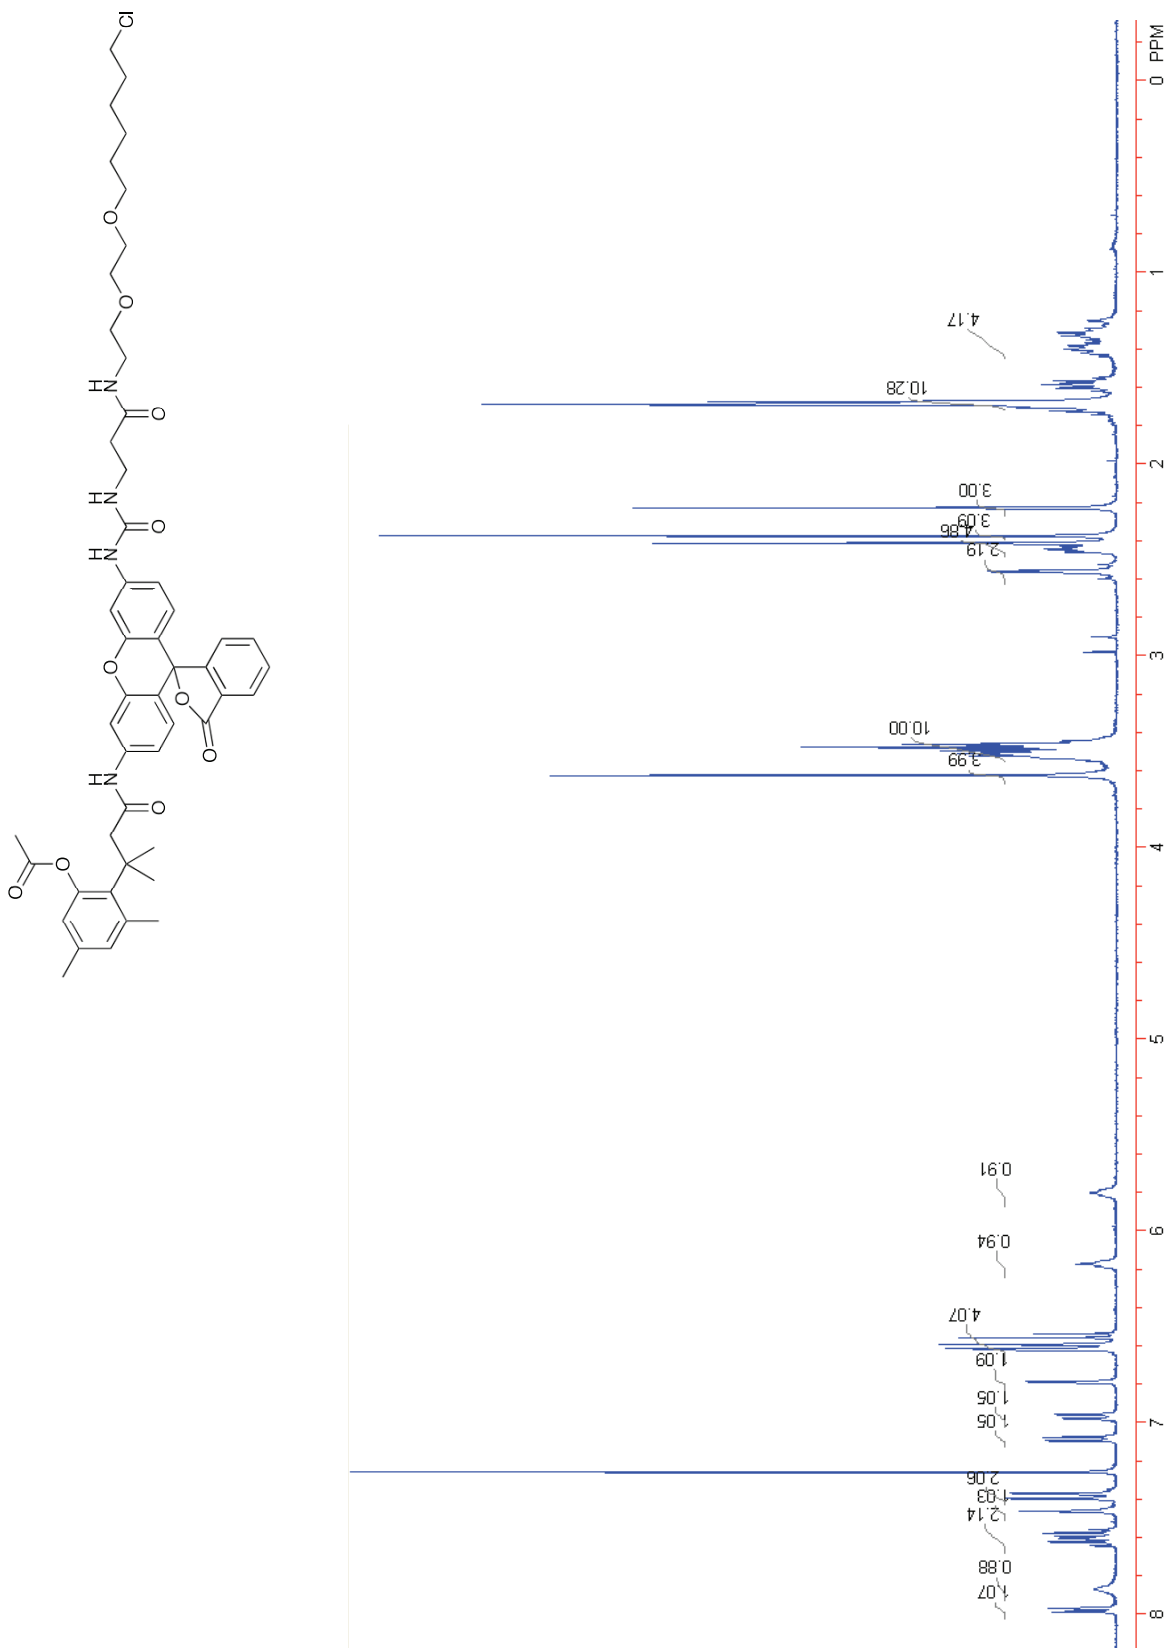

Supplement: b907664f.pdf [file b907664f.pdf]
